# Aerobic fitness is associated with cerebral mu-opioid receptor availability and activation in healthy humans

Tiina Saanijoki<sup>1,2</sup>, Tatu Kantonen<sup>1,3</sup>, Laura Pekkarinen<sup>1,4</sup>, Kari Kalliokoski<sup>1</sup>, Jussi Hirvonen<sup>1,5</sup>, Lauri Tuominen<sup>1,6</sup>, Jetro J. Tuulari<sup>1,7</sup>, Eveliina Arponen<sup>1</sup>, Pirjo Nuutila<sup>1,4</sup>, Lauri Nummenmaa<sup>1,8</sup>

1) Turku PET Centre, University of Turku, Turku, Finland, 2) Turku BioImaging, University of Turku and Åbo Akademi University, Turku, Finland, 3) Clinical Neurosciences, University of Turku and Turku University Hospital, Turku, Finland 4) Department of endocrinology, Turku University Hospital, Turku, Finland, 5) Department of Radiology, Turku University Hospital, Turku, Finland, 6) The Royal's Institute of Mental Health Research, University of Ottawa, Ottawa, ON, Canada, 7) FinnBrain Birth Cohort Study, Turku Brain and Mind Center, Department of Clinical Medicine, University of Turku, Turku, Finland, 8) Department of Psychology, University of Turku, Turku, Finland

## Address correspondence to

Tiina Saanijoki

Turku PET Centre c/o Turku University Hospital

Kiinamylynkatu 4-6

20520 Turku, Finland

Email: [tiina.saanijoki@utu.fi](mailto:tiina.saanijoki@utu.fi)

**NOTE: This preprint reports new research that has not been certified by peer review and should not be used to guide clinical practice.**

## ABSTRACT

Central  $\mu$ -opioid receptors (MORs) modulate affective responses to physical exercise. Individuals with higher aerobic fitness report greater exercise-induced mood improvements than those with lower fitness, but the link between cardiorespiratory fitness and the MOR system remains unresolved. Here we tested whether maximal oxygen uptake ( $VO_{2peak}$ ) and physical activity level are associated with cerebral MOR availability, and whether these phenotypes predict endogenous opioid release following aerobic exercise. We studied 64 healthy lean men who performed a maximal incremental cycling test for  $VO_{2peak}$  determination, completed a questionnaire assessing moderate-to-vigorous physical activity (MVPA, min/week), and underwent positron emission tomography with [ $^{11}C$ ]carfentanil, a specific radioligand for MOR. A subset of 24 subjects underwent additional PET scan also after a one-hour session of moderate-intensity exercise. Higher  $VO_{2peak}$  and self-reported MVPA level was associated with larger decrease in cerebral MOR binding after aerobic exercise in ventral striatum, orbitofrontal cortex and insula. That is, higher fit and more trained individuals showed greater opioid release acutely following exercise in brain regions especially relevant for reward and cognitive processing. Higher  $VO_{2peak}$  also associated with lower baseline  $BP_{ND}$  in the reward and pain circuits, i.e., in frontal and cingulate cortices as well as in temporal lobes and subcortically in thalamus and putamen. We conclude that higher aerobic fitness and regular exercise training may induce neuroadaptation within the MOR system which might contribute to improved emotional and behavioural responses associated with long-term exercise.

## Introduction

Habitual physical activity and cardiorespiratory fitness (CRF) are well-established modifiable lifestyle factors that promote brain health throughout the lifespan. Higher fitness and greater amounts of physical activity are linked with better cognitive functioning [1,2], lower levels of anxiety and depression [3,4], and reduced risk for neurodegenerative disease [5]. These biological and psychological benefits of exercise are paralleled in brain structure and function. Better fitness and higher physical activity levels are associated with higher grey [6–8] and white matter volume [6,9,10]. In addition, several intervention studies have demonstrated that improved fitness positively affects brain volumes in older adults, especially in frontotemporal regions that are important for cognition and memory functions, and most susceptible to age-related brain atrophy [11–14]. Moreover, higher aerobic fitness promotes efficient functional connectivity of multiple brain networks supporting cognitive control and memory functions [15,16].

Physical exercise also acutely affects functioning of the brain's neuromodulatory systems, particularly the endogenous opioid system [17]. Endogenous opioid system and especially  $\mu$ -opioid receptors (MORs) are closely involved in processing reward [18], motivation [19,20], and emotions [21]. They also have a central role in several physiological functions such as pain processing [22] and stress regulation [23,24], and recent evidence links opioid system dysregulation with depressive and anxious symptoms [25]. Therefore, the opioid system could potentially mediate the psychological benefits of regular exercise such as improved mood.

Animal studies investigating the effects of regular exercise training on the opioid system have found elevated  $\beta$ -endorphin and met-enkephalin levels in periaqueductal grey area and rostral ventromedial medulla after five weeks of treadmill running [26] and shown that chronic exercise, in comparison with short-term exercise or no exercise, decreases MOR expression [27] and overall MOR availability in rat brain [28]. Exercising rats also show decreased sensitivity to antinociceptive effects of exogenous opioid agonists such as morphine, which may indicate downregulation of MORs resulting from increased endogenous opioid concentrations elevated by regular exercise training [29,30]. Human neuroimaging studies have demonstrated that a single bout of moderate-to-vigorous exercise stimulates endogenous opioid release in the brain, which is associated with affective responses induced by exercise [31–33]. Taken together, converging evidence from animal and human studies suggest that regular exercise training might induce neuroadaptation within central MOR system, subsequently contributing to improvements in mood and stress regulation. Yet, *in vivo* evidence from humans is currently lacking.

Here we investigated whether individual differences in baseline MOR availability are associated with cardiorespiratory fitness and habitual physical activity levels in healthy young men. We used *in vivo* PET imaging with the highly selective MOR agonist ligand [<sup>11</sup>C]carfentanil. We coupled MOR data with measurement of VO<sub>2peak</sub>, an objective and direct measure of CRF, and with self-reported physical activity questionnaires. To test whether higher fitness and physical activity levels influence the capacity of acute exercise to activate the MOR system, we also studied a subset of participants with [<sup>11</sup>C]carfentanil PET after a one-hour session of aerobic exercise. Based on previous human and animal research, we hypothesized that higher levels of fitness and physical activity would be negatively associated with cerebral MOR availability in the brain's reward circuits and positively associated with GM volume. We predicted that VO<sub>2peak</sub> and self-reported physical activity would be associated with exercise-induced changes in MOR availability.

## Materials and Methods

### Subjects

The Ethics Committee of the Hospital District of Southwest Finland approved the study protocol, and the study was conducted in accordance with the Declaration of Helsinki. All subjects signed ethics-committee-approved informed consent forms. 64 male adults with a variable exercise background were enrolled in the study (Table 1). They were recruited via Internet discussion forums, traditional bulletin boards, university-hosted email lists and newspaper advertisements. The exclusion criteria were poor compliance, a history of or current neurological or psychiatric disease, use of tobacco products or medication affecting the central nervous system, current or past excessive alcohol or substance abuse, as well as standard PET and MRI exclusion criteria. Laboratory tests, urinalysis, and an ECG were obtained to assess health and the absence of psychoactive drugs. These data have originally been collected in clinical trials EXEBRAIN (NCT02615756) and PROSPECT (NCT03106688).

**Table 1.** Subject characteristics (n=64).

|                                                           | Mean (SD)  | Range     |
|-----------------------------------------------------------|------------|-----------|
| Age (years)                                               | 25.4 (4.6) | 20–36     |
| Body Mass Index (kg/m <sup>2</sup> )                      | 24.1 (2.8) | 18.5–31.0 |
| Total physical activity (min/week)                        | 291 (165)  | 0–870     |
| Peak oxygen consumption (VO <sub>2peak</sub> ; ml/kg/min) | 44.5 (7.9) | 25.8–61.7 |

## Physical activity and aerobic fitness measurements

Self-reported physical activity was assessed with a questionnaire where participants rated the frequency (days/week) and duration (hours and minutes/week) of moderate to vigorous physical activity (MVPA) and other physical activity during the last three months. CRF was assessed as peak oxygen consumption ( $VO_{2peak}$ ), which was determined in a maximal exercise test performed on a cycle ergometer starting at 40-50 W and followed by an increase of 30 W in every 2 minutes until volitional exhaustion. Ventilation and gas exchange were measured (Jaeger Oxycon Pro; VIASYS Healthcare) and reported as the mean value per minute. The highest 1-min mean value of oxygen consumption was expressed as the  $VO_{2peak}$ .

## PET data acquisition

We measured MOR availability with the agonist radioligand [ $^{11}C$ ]carfentanil that has high affinity for MORs. Radioligand synthesis for the EXEBRAIN trial has been described previously [32]. For the scans from the PROSPECT trial, [ $^{11}C$ ]carfentanil was synthesized using [ $^{11}C$ ]methyl triflate, where cyclotron-produced [ $^{11}C$ ]methane was halogenated by gas phase reaction into [ $^{11}C$ ]methyl iodide [34] and converted online into [ $^{11}C$ ]methyl triflate [35]. The [ $^{11}C$ ]methane was produced at the Accelerator Laboratory of the Åbo Akademi University, using the  $^{14}N(p,\alpha)^{11}C$  nuclear reaction in a  $N_2-H_2$  target gas (10 %  $H_2$ ). [ $^{11}C$ ]methyl triflate was bubbled into a solution containing acetone (200  $\mu$ l), O-desmethyl precursor (0.3–0.4 mg, 0.79–1.05  $\mu$ mol) and tetrabutylammonium hydroxide (aq) (4  $\mu$ l, 0.2 M) at 0 °C. The reaction mixture was diluted and loaded into a solid phase extraction cartridge (C18 Sep-Pak<sup>®</sup> Light, Waters Corp., Milford, MA) and the cartridge was washed. Dilution and washing were done using 25% ethanol in sterile water solution, 10 mL each step. The [ $^{11}C$ ]carfentanil was extracted with ethanol from the cartridge, diluted with 0.1 M phosphate buffer solution into < 10 % ethanol level and finally sterile filtered (Millex GV, 0.22  $\mu$ m polyvinylidene fluoride membrane, 33 mm, Merck Millipore). Analytical HPLC column (Phenomenex Luna<sup>®</sup> 5  $\mu$ m C8(2) 100 Å, 4.6  $\times$  100 mm), acetonitrile (32.5%) in 50 mM  $H_3PO_4$  mobile phase, 1 ml/min flow rate, 7 min run time and detectors in series for UV absorption (210 nm) and radioactivity were used for determination of identity, radiochemical purity and mass concentration. Radiochemical purity of the produced [ $^{11}C$ ]carfentanil batches was  $98.5 \pm 0.3$  % (mean  $\pm$  SD). The injected [ $^{11}C$ ]Carfentanil radioactivity was  $248 \pm 11$  MBq and molar radioactivity at time of injection  $290 \pm 110$  MBq/nmol corresponding to an injected mass of  $0.40 \pm 0.23$   $\mu$ g.

Subjects refrained from exercise at least 24 hours and fasted for at least 2 h before scanning. Data were acquired with the 3T Philips Ingenuity TF PET/MR (PhilipsHealthcare, Cleveland, OH, USA) scanner or PET/CT (GE Discovery VCT PET/CT, GE Healthcare (General Electric Medical Systems, Milwaukee, WI, USA) at Turku PET Centre. Data acquisition started concomitantly with the intravenous

radioligand bolus-injection ( $M = 250$  MBq,  $SD = 13$  MBq), and cerebral radioactivity was measured for 51 min. Data were corrected for dead-time, decay, and measured photon attenuation.

### **PET challenge paradigm for exercise-induced opioid release**

A subset of participants ( $n = 23$ ) underwent an additional PET scan after a one-hour session of moderate-intensity cycling exercise on a separate day; the protocol and opioid release data have been reported previously [32]. The order of the exercise / rest PET studies was randomized and counterbalanced for these participants. Emotional reactions to physical exercise were measured with Positive Affect and Negative Affect Schedule [36].

### **MRI acquisition**

Anatomical MR images were acquired for VBM as well as for preprocessing the PET images with the 3T Philips Ingenuity TF PET/MR scanner using a T1-weighted sequence with  $1\text{ mm}^3$  resolution (TR 8.1 ms, TE 3.7 ms, flip angle  $7^\circ$ , scan time 263 s). Complementary voxel-based morphometric analyses on the association between aerobic fitness, physical activity and cerebral density are described in SI.

### **PET data preprocessing and analysis**

PET data were processed with the automated Magia pipeline [37] (<https://github.com/tkkarjal/magia>). Processing began with motion-correction of the PET data followed by coregistration of the PET and MR images. Magia uses FreeSurfer (<http://surfer.nmr.mgh.harvard.edu/>) to define the regions of interest (ROIs) as well as the reference regions. The ROI-wise kinetic modeling was based on extraction of ROI-wise time-activity curves. The PET images were slightly smoothed using Gaussian kernel (2 mm full width at half maximum, FWHM) to increase signal-to-noise ratio before model fitting. Parametric images were spatially normalized to MNI-space and finally smoothed using a Gaussian kernel (FWHM = 6 mm). [ $^{11}\text{C}$ ]carfentanil binding was quantified by binding potential ( $BP_{ND}$ ), which is the ratio of specific binding to non-displaceable binding in the tissue [38]. Occipital cortex was used as the reference region [39].

### **Statistical analysis**

The effects of  $VO_{2\text{peak}}$  and self-reported physical activity on i) MOR availability, ii) MOR activity following physical exercise, and iii) on GM densities were assessed in SPM12 (<http://www.fil.ion.ucl.ac.uk/spm/>) using linear regression model with BMI and PET scanner (for PET data) as a covariate. Statistical threshold was set at  $p < 0.05$ , FDR-corrected at cluster level. Atlas-based ROIs were generated in the MOR-rich regions in the brain (amygdala, hippocampus, ventral striatum, dorsal caudate, thalamus, insula, orbitofrontal cortex (OFC), anterior cingulate cortex (ACC), middle

cingulate cortex (MCC), and posterior cingulate cortex (PCC) using AAL [40] and Anatomy [41] toolboxes. Mean regional [ $^{11}\text{C}$ ]carfentanil  $BP_{\text{ND}}$  were extracted for each region, and the averaged ROI data were analysed with R statistical software (<https://cran.r-project.org>) [42].

## Results

### **$\text{VO}_{2\text{peak}}$ is associated with physical activity level, age, and BMI**

$\text{VO}_{2\text{peak}}$  was positively associated with self-reported physical activity ( $r = 0.45, p < 0.01$ ) and negatively associated with age ( $r = -0.37, p < 0.01$ ) and BMI ( $r = -0.46, p < 0.01$ ). Age was positively associated with BMI ( $r = 0.38, p < 0.01$ ).

### **Higher $\text{VO}_{2\text{peak}}$ and MVPA level predict larger decrease in MOR availability after exercise**

There were no significant differences in [ $^{11}\text{C}$ ]carfentanil  $BP_{\text{ND}}$  between baseline and moderate-intensity exercise conditions at group level, as reported in previously published work [32]. However, change in MOR availability varied notably between individuals following aerobic exercise, such that  $BP_{\text{ND}}$  decreased in some individuals but increased in others. We then tested whether exercise-induced changes in  $BP_{\text{ND}}$  would be associated with self-reported physical activity or  $\text{VO}_{2\text{peak}}$ , indicative of exercise habit-dependent MOR activation. We found a negative association between  $\text{VO}_{2\text{peak}}$  and exercise-induced change in  $BP_{\text{ND}}$ , such that higher  $\text{VO}_{2\text{peak}}$  was associated with larger decrease in  $BP_{\text{ND}}$  after exercise (**Fig. 1**). This effect was observed in ventral and dorsal striatum, left hippocampus, left thalamus, insular cortex, somatosensory cortex, temporal areas, and orbitofrontal cortex. Exercise-induced change in  $BP_{\text{ND}}$  was also correlated with self-reported MVPA (**Fig. 2**), however no associations were found between total self-reported physical activity and exercise-induced change in  $BP_{\text{ND}}$ .

We previously reported enhanced mood responses after aerobic exercise [32]. Here, we found a positive association between  $\text{VO}_{2\text{peak}}$  and change in positive affect as measured with Positive Affect and Negative Affect Schedule before and after aerobic exercise ( $r = 0.59, p < 0.01$ ), indicating that higher  $\text{VO}_{2\text{peak}}$  was associated with higher mood improvement.

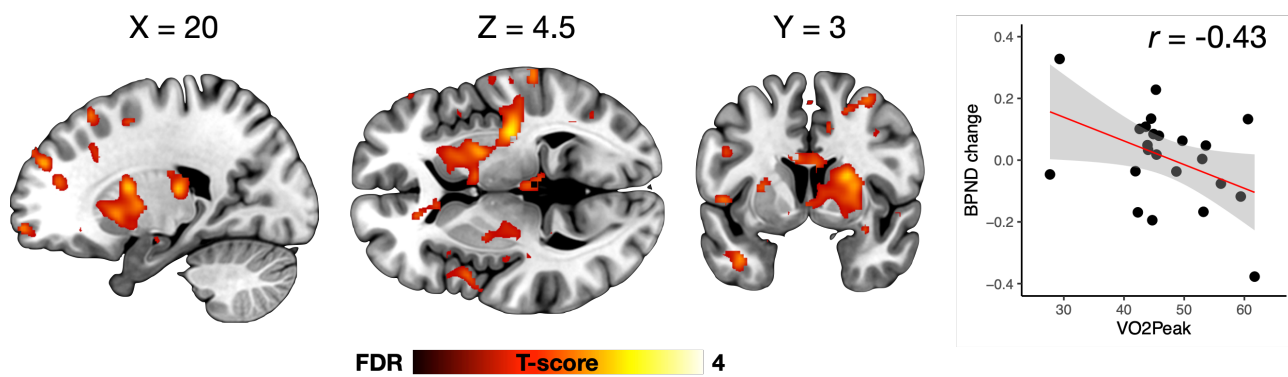

**Figure 1.** Higher aerobic fitness predicted higher exercise-induced opioid release after moderate-intensity exercise, as indicated by a negative association between  $VO_{2peak}$  and change in BP<sub>ND</sub> after one-hour session of aerobic exercise. The data are thresholded at  $p < 0.05$ , FDR-corrected at the cluster level. Scatterplot shows the corresponding association (LS-regression line with 95% CI) in putamen.

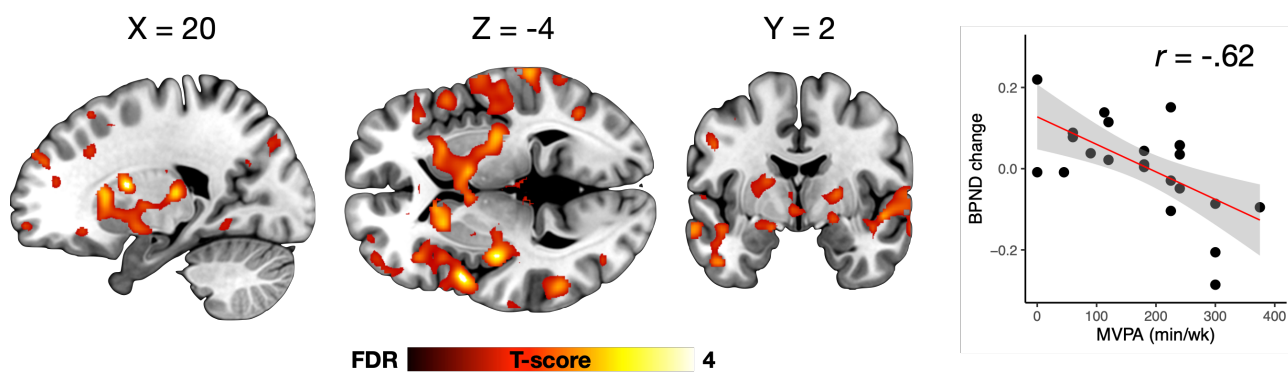

**Figure 2.** Higher training level predicted higher exercise-induced opioid release after moderate-intensity exercise, as indicated by a negative association between self-reported moderate-to-vigorous physical activity (MVPA) level and changes in BP<sub>ND</sub> after one-hour session of aerobic exercise. The data are thresholded at  $p < 0.05$ , FDR-corrected at the cluster level. Scatterplot shows the corresponding association (LS-regression line with 95% CI) in the right fusiform gyrus.

### Fitness and physical activity level are negatively associated with baseline MOR availability

We next tested whether baseline differences in aerobic fitness are associated with MOR availability. Full-volume analysis showed a negative association between  $VO_{2peak}$  and baseline MOR availability (BP<sub>ND</sub>) in a large cluster extending to both hemispheres from the frontal lobe to the parieto-occipital sulcus (**Fig. 3**). Significant associations were also observed in bilateral putamen, thalamus, insula, and temporal cortices. The ROI analysis revealed significant associations in orbitofrontal and middle cingulate cortices ( $ps < 0.05$ ). Comparable analysis where MOR availability was predicted with self-reported physical activity yielded similar effects, but only when BMI was not controlled for in the model (data not shown).



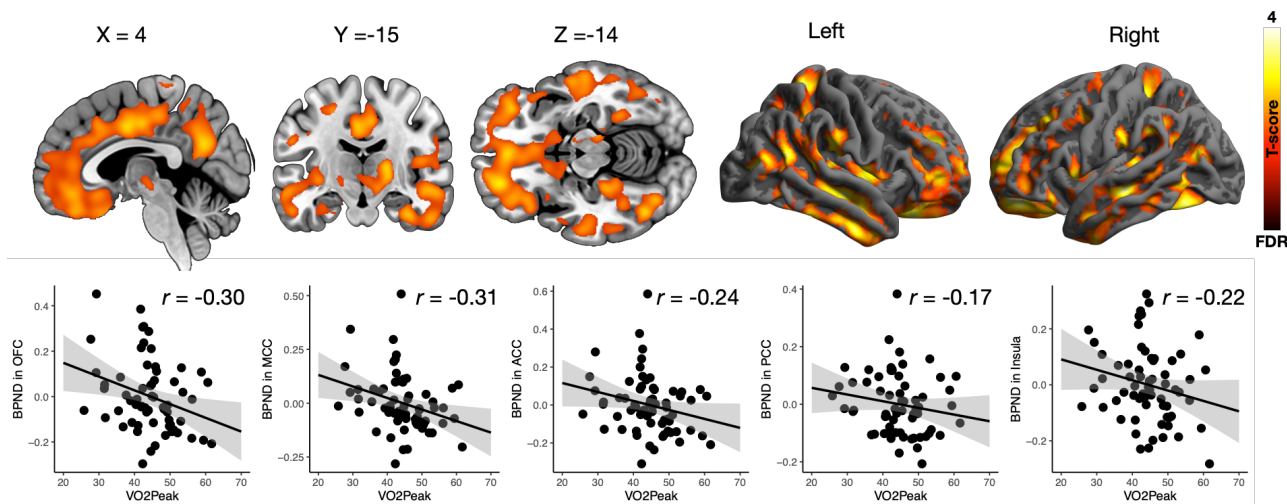

**Figure 3.** Negative association between  $VO_{2peak}$  and  $[^{11}C]$ carfentanil  $BP_{ND}$ . The data are thresholded at  $p < 0.05$ , FDR-corrected at the cluster level. Scatterplots show the corresponding association (LS-regression line with 95% CI) in representative anatomical regions of interest.

Ageing has regionally specific effects on MOR availability [43]. Although our subjects had a relatively narrow age range ( $M = 25.4$ ,  $SD = 4.6$ ) we nevertheless wanted to statistically control for potential ageing-dependent effects in the MOR availability. When age was entered in the analysis as a covariate, no associations were observed between MOR availability and  $VO_{2peak}$  or self-reported physical activity at the a priori statistical threshold. However, with more lenient thresholding ( $p < 0.05$  uncorrected) the spatial pattern of results remained similar as shown in **Fig 3**.  $VO_{2peak}$  showed positive association with GM density when controlling for age and BMI (Supplementary Figure S1). These findings are described in detail in Supplementary Information.

## Discussion

The present findings indicate that aerobic fitness has a previously unrecognized role in brain opioid signaling. Higher cardiorespiratory fitness, as measured by  $VO_{2peak}$ , and higher self-reported moderate-to-vigorous physical activity (MVPA) level, were associated with larger decrease in cerebral MOR binding after aerobic exercise in ventral striatum, orbitofrontal cortex and insula. In other words, higher-fit individuals showed greater acute opioid release following exercise in brain regions involved in reward and cognitive processing. We also found that higher  $VO_{2peak}$  was associated with lower baseline  $BP_{ND}$  in the reward and pain circuits, i.e., in frontal and cingulate cortices as well as in temporal lobes and subcortically in thalamus and putamen. Conversely,  $VO_{2peak}$  was positively associated with GM density in several brain regions including medial and lateral frontal and orbitofrontal cortices, cingulate cortex and striatum. Taken together, these data suggest that aerobic fitness may modulate cerebral MOR tone and

function which might be an important pathway regulating exercise habits, and that aerobic fitness and physically active lifestyle protect against GM loss not only in older adults but also in early adulthood.

### **Higher aerobic fitness predicts greater decrease in MOR binding after aerobic exercise**

Previous research has shown that exercise intensity modulates opioid action in the brain [32,33]. High-intensity exercise induces a robust opioid release, whereas moderate-intensity exercise results in decreased MOR availability in some and increased in other individuals [32]. Here we report, for the first time, that both higher  $VO_{2peak}$  and MVPA levels are associated with higher cerebral opioid release after a bout of moderate-intensity exercise, suggesting that aerobic fitness and physical activity level may shape opioidergic response following aerobic exercise. This dependency on prior aerobic fitness likely explains why moderate-intensity exercise does not result in net opioid release when individuals with different fitness status are assessed together [32]. The present findings go beyond past reports, which have only examined the association of training status on peripheral opioid concentrations after exercise. Higher circulating  $\beta$ -endorphin levels has been found in well-trained athletes, in comparison with untrained individuals, after a graded exercise test [44] and after a bout of supramaximal exercise [45]. In contrast, high-intensity cycling (70% and 80% of  $VO_{2max}$ ) resulted in similar increase in plasma  $\beta$ -endorphin concentration in both trained and untrained individuals whereas moderate-intensity cycling (60% of  $VO_{2max}$ ) showed no effect on plasma  $\beta$ -endorphin concentration [46]. While it has been suggested that training-induced adaptation within the opioid system could increase the response capacity to extreme exercise stress [45], peripheral opioid levels probably do not mirror those of the brain [47] and thus limits reasonable comparison of these studies.

We observed greater opioid release in higher fit participants after aerobic exercise in ventral and dorsal striatum, left hippocampus, left thalamus, insular cortex, somatosensory cortex, temporal areas, and orbitofrontal cortex. MORs in these regions are closely involved in processing both nociceptive and hedonic signals [21,48] as well as modulating decision making and cognitive control [49]. We found that higher fit participants experienced greater improvements in mood following the aerobic exercise. This accords with previous studies reporting that better fitness level [50] and regular exercise participation are associated with more positive affective responses [51–53] and enhanced anxiety relief [52,54] following a bout of exercise. Antinociceptive effects of acute exercise have also been found to depend on fitness level [55]. We propose that greater opioid release could explain enhanced emotional and antinociceptive responses reported by people with higher exercise levels and thus, bear implications in long-term exercise engagement.

### **Greater aerobic fitness and physical activity level are associated with lower MOR availability**

We found that  $VO_{2peak}$  and self-reported physical activity were negatively correlated with baseline [ $^{11}C$ ]carfentanil  $BP_{ND}$ , suggesting that higher levels of regular exercise promoting better aerobic fitness may induce neuroadaptation within the endogenous opioid system. This accords with prior animal studies that have established a relationship between habitual physical activity and endogenous opioid system [27–30]. Chronic exercise, in comparison with short-term exercise or no exercise, decreases MOR expression [27] and overall MOR binding in rat brain [28], demonstrating a causal link between exercise and MOR binding. We observed associations between  $VO_{2peak}$  and  $BP_{ND}$  mainly in cortical regions including prefrontal, cingulate, insular and parahippocampal cortices, but also in subcortical regions, such as putamen and thalamus. As these regions are closely implicated in the modulation of emotions [21,48] and cognitive processes [49], functional changes in these regions may mediate many psychological benefits derived from regular exercise practice as well as exercise motivation and habits. In line with this, functional imaging studies have consistently reported associations between various indices of fitness such as  $VO_{2peak}$  or blood lactate curve and executive functions in lateral fronto-parietal and anterior cingulate cortices [56–60]. Additionally, temporal regions have been suggested to play a role in regular exercise induced mood improvements [61], and insula and parietal cortex have shown altered reward processing in response to regular exercise training [62]. Given the found association between aerobic fitness and MOR availability in these regions, enhanced opioid modulation following improved fitness might contribute to long-term exercise-induced benefits in emotional and cognitive processing.

Reduced MOR binding may reflect either down-regulation of MORs, increased opioid tone and following competition between endogenous opioids and the radioligand, or a combination of the two. Previous animal studies suggest that regular exercise training increases tonic endogenous opioid levels. In rats, exercise training for five to eight weeks increases basal  $\beta$ -endorphin concentration in cerebrospinal fluid [63] and plasma [64] and elevates both  $\beta$ -endorphin and met-enkephalin levels in periaqueductal grey area and rostral ventromedial medulla [26]. Such rise in tonic opioid levels is also associated with altered pain processing, as regular exercise training increases nociceptive threshold in rats [65], reverses measures of pain in animal models of chronic pain [26,66,67], and as these effects can be reversed by an opioid receptor antagonist naloxone [26,65–67]. Sensitivity to antinociceptive effects of exogenous opioid agonists such as morphine also decreases in exercising animals, suggesting that chronic exercise induces cross-tolerance to exogenously administered opioid agonists due to greater concentrations of endogenous opioid peptides [29,30]. Higher opioid levels may also contribute to long-term adaptations of other physiological and behavioural responses associated with regular exercise, such as improved mood and stress regulation, but may also be implicated in exercise addiction [30].

Altogether our findings suggest that improving aerobic fitness by regular physical activity of moderate to high intensity could influence MOR system in two ways. First, by altering the baseline MOR availability and second, by improving exercise-induced opioid functioning by enhancing the capacity of single session of aerobic exercise to activate the MOR system and concomitant positive affective responses. Such exercise training derived MOR adaptation might further facilitate long-term exercise motivation and continuous exercise practice [68,69], yet this idea remains to be determined in future studies.

### **Limitations**

In the present study, both age and BMI correlated positively with MOR availability. However, prior work with larger sample has shown that ageing increases MOR availability in frontotemporal areas and decreases it in thalamus and nucleus accumbens, and that MOR availability has no significant association with BMI [43]. Thus, pure age effects would unlikely explain our findings in the thalamus. Despite the narrow age range (20-36 years) of our subjects, when age was included as a covariate in the model between baseline MOR availability and aerobic fitness or self-reported physical activity, the effects were statistically less significant. Consequently, it is difficult to disentangle the presently observed fitness-dependent effects on baseline MOR availability from the joint effects between fitness and age.

### **Conclusions**

We conclude that higher aerobic fitness and higher MVPA level are associated with greater reductions in MOR availability after a bout of aerobic exercise, suggesting greater exercise-induced opioid release in high fit and more trained individuals. Moreover, aerobic fitness was negatively associated with baseline MOR availability and positively associated with grey matter density. Lower MOR binding in higher fit participants in the present study may result from higher endogenous opioid levels following regular exercise training, yet this remains speculative as the outcome measure  $BP_{ND}$  does not distinguish between receptor density, affinity, and the amount of endogenous neurotransmitter occupancy. Nevertheless, the associations between  $VO_{2peak}$  and baseline MOR availability and reduced MOR availability after exercise suggest that regular exercise training may induce neuroadaptation within the MOR system also in humans, which may further modulate physiological and behavioural responses governed by the opioid system.

### **Funding**

This study was supported by the Academy of Finland (grants #251125, #251399, #256470, #265917, #281440, #283319, #304385, and #332225) and Sigrid Juselius foundation. We thank Emil Aaltonen

Foundation, Finnish Cultural Foundation (Southwest Finland Fund), and Jenny and Antti Wihuri Foundation for personal grants to TK. The authors declare no conflict of interest.

Supplementary information accompanies this paper.

## References

1. Pentikäinen H, Savonen K, Ngandu T, Solomon A, Komulainen P, Pajanen T, et al. Cardiorespiratory Fitness and Cognition: Longitudinal Associations in the FINGER Study. *J Alzheimer's Dis.* 2019;68:961–8.
2. Zhu N, Jacobs DR, Schreiner PJ, Yaffe K, Bryan N, Launer LJ, et al. Cardiorespiratory fitness and cognitive function in middle age: the CARDIA study. *Neurology.* 2014;82:1339–46.
3. Sui X, Laditka JN, Church TS, Hardin JW, Chase N, Davis K, et al. Prospective study of cardiorespiratory fitness and depressive symptoms in women and men. *J Psychiatr Res.* 2009;43:546–52.
4. Baumeister SE, Leitzmann MF, Bahls M, Dörr M, Schmid D, Schomerus G, et al. Associations of Leisure-Time and Occupational Physical Activity and Cardiorespiratory Fitness With Incident and Recurrent Major Depressive Disorder, Depressive Symptoms, and Incident Anxiety in a General Population. *J Clin Psychiatry.* 2017;78:e41–7.
5. DeFina LF, Willis BL, Radford NB, Gao A, Leonard D, Haskell WL, et al. The Association Between Midlife Cardiorespiratory Fitness Levels and Later-Life Dementia. *Ann Intern Med.* 2013;158:162.
6. Boots EA, Schultz SA, Oh JM, Larson J, Edwards D, Cook D, et al. Cardiorespiratory fitness is associated with brain structure, cognition, and mood in a middle-aged cohort at risk for Alzheimer's disease. *Brain Imaging Behav.* 2015;9:639–49.
7. Raichlen DA, Klimentidis YC, Bharadwaj PK, Alexander GE. Differential associations of engagement in physical activity and estimated cardiorespiratory fitness with brain volume in middle-aged to older adults. *Brain Imaging Behav.* 2019;1–10.
8. Killgore WDS, Olson EA, Weber M. Physical Exercise Habits Correlate with Gray Matter Volume of the Hippocampus in Healthy Adult Humans. *Sci Rep.* 2013;3:3457.
9. Hayes SM, Salat DH, Forman DE, Sperling RA, Verfaellie M. Cardiorespiratory fitness is associated with white matter integrity in aging. *Ann Clin Transl Neurol.* 2015;2:688–98.
10. Johnson NF, Kim C, Clasey JL, Bailey A, Gold BT. Cardiorespiratory fitness is positively

- correlated with cerebral white matter integrity in healthy seniors. *Neuroimage*. 2012;59:1514–23.
11. Colcombe SJ, Erickson KI, Scalf PE, Kim JS, Prakash R, McAuley E, et al. Aerobic Exercise Training Increases Brain Volume in Aging Humans. *Journals Gerontol Ser A Biol Sci Med Sci*. 2006;61:1166–70.
  12. Erickson KI, Voss MW, Prakash RS, Basak C, Szabo A, Chaddock L, et al. Exercise training increases size of hippocampus and improves memory. *Proc Natl Acad Sci U S A*. 2011;108:3017–22.
  13. Kleemeyer MM, Kühn S, Prindle J, Bodammer NC, Brechtel L, Garthe A, et al. Changes in fitness are associated with changes in hippocampal microstructure and hippocampal volume among older adults. *Neuroimage*. 2016;131:155–61.
  14. Maass A, Düzel S, Goerke M, Becke A, Sobieray U, Neumann K, et al. Vascular hippocampal plasticity after aerobic exercise in older adults. *Mol Psychiatry*. 2015;20:585–93.
  15. Voss MW, Weng TB, Burzynska AZ, Wong CN, Cooke GE, Clark R, et al. Fitness, but not physical activity, is related to functional integrity of brain networks associated with aging. *Neuroimage*. 2016;131:113.
  16. Talukdar T, Nikolaidis A, Zwillig CE, Paul EJ, Hillman CH, Cohen NJ, et al. Aerobic Fitness Explains Individual Differences in the Functional Brain Connectome of Healthy Young Adults. *Cereb Cortex*. 2018;28:3600–9.
  17. Greenwood BN, Foley TE, Le T V, Strong P V, Loughridge AB, Day HEW, et al. Long-term voluntary wheel running is rewarding and produces plasticity in the mesolimbic reward pathway. *Behav Brain Res*. 2011;217:354–62.
  18. Fields HL, Margolis EB. Understanding opioid reward. *Trends Neurosci*. 2015;38:217–25.
  19. Selleck RA, Giacomini J, Buchholtz BD, Lake C, Sadeghian K, Baldo BA. Modulation of appetitive motivation by prefrontal cortical mu-opioid receptors is dependent upon local dopamine D1 receptor signaling. *Neuropharmacology*. 2018;140:302–9.
  20. Laurent V, Morse AK, Balleine BW. The role of opioid processes in reward and decision-making. *Br J Pharmacol*. 2015;172:449–59.
  21. Nummenmaa L, Tuominen L. Opioid system and human emotions. *Br J Pharmacol*. 2018;175:2737–49.
  22. Corder G, Castro DC, Bruchas MR, Scherrer G. Endogenous and Exogenous Opioids in Pain. *Annu Rev Neurosci*. 2018;41:453–73.
  23. Lovallo WR, Enoch M-A, Acheson A, Cohoon AJ, Sorocco KH, Hodgkinson CA, et al. Cortisol Stress Response in Men and Women Modulated Differentially by the Mu-Opioid Receptor Gene Polymorphism OPRM1 A118G. *Neuropsychopharmacology*. 2015;40:2546–54.

24. Ribeiro SC, Kennedy SE, Smith YR, Stohler CS, Zubieta J-K. Interface of physical and emotional stress regulation through the endogenous opioid system and mu-opioid receptors. *Prog Neuropsychopharmacol Biol Psychiatry*. 2005;29:1264–80.
25. Nummenmaa L, Karjalainen T, Isojärvi J, Kantonen T, Tuisku J, Kaasinen V, et al. Lowered endogenous mu-opioid receptor availability in subclinical depression and anxiety. *Neuropsychopharmacology*. 2020;45:1953–9.
26. Stagg NJ, Mata HP, Ibrahim MM, Henriksen EJ, Porreca F, Vanderah TW, et al. Regular exercise reverses sensory hypersensitivity in a rat neuropathic pain model: role of endogenous opioids. *Anesthesiology*. 2011;114:940–8.
27. de Oliveira MSR, da Silva Fernandes MJ, Scorza FA, Persike DS, Scorza CA, da Ponte JB, et al. Acute and chronic exercise modulates the expression of MOR opioid receptors in the hippocampal formation of rats. *Brain Res Bull*. 2010;83:278–83.
28. Arida RM, Gomes da Silva S, de Almeida AA, Cavalheiro EA, Zavala-Tecuapetla C, Brand S, et al. Differential effects of exercise on brain opioid receptor binding and activation in rats. *J Neurochem*. 2015;132:206–17.
29. Smith MA, Lyle M. Chronic exercise decreases sensitivity to mu opioids in female rats: Correlation with exercise output. *Pharmacol Biochem Behav*. 2006;85:12–22.
30. Smith MA, Yancey DL. Sensitivity to the effects of opioids in rats with free access to exercise wheels: mu-opioid tolerance and physical dependence. *Psychopharmacology (Berl)*. 2003;168:426–34.
31. Boecker H, Sprenger T, Spilker ME, Henriksen G, Koppenhoefer M, Wagner KJ, et al. The runner's high: opioidergic mechanisms in the human brain. *Cereb cortex*. 2008;18:2523–31.
32. Saanijoki T, Tuominen L, Tuulari JJ, Nummenmaa L, Arponen E, Kalliokoski K, et al. Opioid Release after High-Intensity Interval Training in Healthy Human Subjects. *Neuropsychopharmacology*. 2018;43:246–54.
33. Hiura M, Sakata M, Ishii K, Toyohara J, Oda K, Nariai T, et al. Central  $\mu$ -Opioidergic System Activation Evoked by Heavy and Severe-Intensity Cycling Exercise in Humans: a Pilot Study Using Positron Emission Tomography with  $^{11}\text{C}$ -Carfentanil. *Int J Sports Med*. 2017;38:19–26.
34. Larsen P, Ulin J, Dahlstrøm K, Jensen M. Synthesis of  $^{11}\text{C}$ iodomethane by iodination of  $^{11}\text{C}$ methane. *Appl Radiat Isot*. 1997;48:153–7.
35. Jewett DM. A simple synthesis of  $^{11}\text{C}$ methyl triflate. *Int J Radiat Appl Instrumentation Part*. 1992;43:1383–5.
36. Watson D, Clark LA, Tellegen A. Development and validation of brief measures of positive and negative affect: the PANAS scales. *J Pers Soc Psychol*. 1988;54:1063–70.

37. Karjalainen T, Tuisku J, Santavirta S, Kantonen T, Bucci M, Tuominen L, et al. Magia: Robust Automated Image Processing and Kinetic Modeling Toolbox for PET Neuroinformatics. *Front Neuroinform.* 2020;14:3.
38. Innis RB, Cunningham VJ, Delforge J, Fujita M, Gjedde A, Gunn RN, et al. Consensus Nomenclature for *in vivo* Imaging of Reversibly Binding Radioligands. *J Cereb Blood Flow Metab.* 2007;27:1533–9.
39. Frost JJ, Douglass KH, Mayberg HS, Dannals RF, Links JM, Wilson AA, et al. Multicompartmental analysis of [11C]-carfentanil binding to opiate receptors in humans measured by positron emission tomography. *J Cereb Blood Flow Metab.* 1989;9:398–409.
40. Tzourio-Mazoyer N, Landeau B, Papathanassiou D, Crivello F, Etard O, Delcroix N, et al. Automated Anatomical Labeling of Activations in SPM Using a Macroscopic Anatomical Parcellation of the MNI MRI Single-Subject Brain. *Neuroimage.* 2002;15:273–89.
41. Eickhoff SB, Stephan KE, Mohlberg H, Grefkes C, Fink GR, Amunts K, et al. A new SPM toolbox for combining probabilistic cytoarchitectonic maps and functional imaging data. *Neuroimage.* 2005;25:1325–35.
42. Rosseel Y. Lavaan: An R package for structural equation modeling. *J Stat Softw.* 2012;48:1–36.
43. Kantonen T, Karjalainen T, Isojärvi J, Nuutila P, Tuisku J, Rinne J, et al. Interindividual variability and lateralization of  $\mu$ -opioid receptors in the human brain: Individual differences in the  $\mu$ -opioid receptor system. *Neuroimage.* 2020;217.
44. de Diego Acosta AM, García JC, Fernández-Pastor VJ, Perán S, Ruiz M, Guirado F. Influence of fitness on the integrated neuroendocrine response to aerobic exercise until exhaustion. *J Physiol Biochem.* 2001;57:313–20.
45. Farrell PA, Kjaer M, Bach FW, Galbo H. Beta-endorphin and adrenocorticotropin response to supramaximal treadmill exercise in trained and untrained males. *Acta Physiol Scand.* 1987;130:619–25.
46. Goldfarb AH, Hatfield BD, Potts J, Armstrong D. Beta-endorphin time course response to intensity of exercise: Effect of training status. *Int J Sports Med.* 1991;12:264–8.
47. Dietrich A, McDaniel WF. Endocannabinoids and exercise. *Br J Sports Med.* 2004;38:536–41.
48. Leknes S, Tracey I. A common neurobiology for pain and pleasure. *Nat Rev Neurosci.* 2008;9:314–20.
49. van Steenbergen H, Eikemo M, Leknes S. The role of the opioid system in decision making and cognitive control: A review. *Cogn Affect Behav Neurosci.* 2019;19:435–58.
50. Petruzzello S, Hall E, Ekkekakis P. Regional brain activation as a biological marker of affective responsiveness to acute exercise: influence of fitness - PubMed [Internet]. *Psychophysiology.* 2001.



p. 38(1):99-106.

51. Magnan RE, Kwan BM, Bryan AD. Effects of current physical activity on affective response to exercise: physical and social-cognitive mechanisms. *Psychol Health*. 2013;28:418–33.
52. Hallgren MÅ, Moss ND, Gastin P. Regular exercise participation mediates the affective response to acute bouts of vigorous exercise. *J Sports Sci Med*. 2010;9:629–37.
53. Hoffman MD, Hoffman DR. Exercisers achieve greater acute exercise-induced mood enhancement than nonexercisers. *Arch Phys Med Rehabil*. 2008;89:358–63.
54. Chen YC, Chen C, Martínez RM, Etnier JL, Cheng Y. Habitual physical activity mediates the acute exercise-induced modulation of anxiety-related amygdala functional connectivity. *Sci Rep*. 2019;9.
55. Schmitt A, Wallat D, Stangier C, Martin JA, Schlesinger-Irsch U, Boecker H. Effects of fitness level and exercise intensity on pain and mood responses. *Eur J Pain (United Kingdom)*. 2020;24:568–79.
56. Colcombe SJ, Kramer AF, Erickson KI, Scalf P, McAuley E, Cohen NJ, et al. Cardiovascular fitness, cortical plasticity, and aging. *Proc Natl Acad Sci U S A*. 2004;101:3316–21.
57. Wong CN, Chaddock-Heyman L, Voss MW, Burzynska AZ, Basak C, Erickson KI, et al. Brain activation during dual-task processing is associated with cardiorespiratory fitness and performance in older adults. *Front Aging Neurosci*. 2015;7.
58. Hayes SM, Hayes JP, Williams VJ, Liu H, Verfaellie M. fMRI activity during associative encoding is correlated with cardiorespiratory fitness and source memory performance in older adults. *Cortex*. 2017;91:208–20.
59. Pensel MC, Daamen M, Scheef L, Knigge HU, Rojas Vega S, Martin JA, et al. Executive control processes are associated with individual fitness outcomes following regular exercise training: blood lactate profile curves and neuroimaging findings. *Sci Rep*. 2018;8:4893.
60. Cui J, Zou L, Herold F, Yu Q, Jiao C, Zhang Y, et al. Does Cardiorespiratory Fitness Influence the Effect of Acute Aerobic Exercise on Executive Function? *Front Hum Neurosci*. 2020;14.
61. Tozzi L, Carballedo A, Lavelle G, Doolin K, Doyle M, Amico F, et al. Longitudinal functional connectivity changes correlate with mood improvement after regular exercise in a dose-dependent fashion. Foxe J, editor. *Eur J Neurosci*. 2016;43:1089–96.
62. Cornier M-A, Melanson EL, Salzberg AK, Bechtell JL, Tregellas JR. The effects of exercise on the neuronal response to food cues. *Physiol Behav*. 2012;105:1028–34.
63. Hoffmann P, Terenius L, Thorén P. Cerebrospinal fluid immunoreactive beta-endorphin concentration is increased by voluntary exercise in the spontaneously hypertensive rat. *Regul Pept*. 1990;28:233–9.

64. Su CF, Chang YY, Pai HH, Liu IM, Lo CY, Cheng JT. Mediation of beta-endorphin in exercise-induced improvement in insulin resistance in obese Zucker rats. *Diabetes Metab Res Rev*. 2005;21:175–82.
65. Shyu BC, Andersson SA, Thorén P. Endorphin mediated increase in pain threshold induced by long-lasting exercise in rats. *Life Sci*. 1982;30:833–40.
66. Brito RG, Rasmussen LA, Sluka KA. Regular physical activity prevents development of chronic muscle pain through modulation of supraspinal opioid and serotonergic mechanisms. *Pain reports*. 2017;2:e618.
67. Bement MKH, Sluka KA. Low-Intensity Exercise Reverses Chronic Muscle Pain in the Rat in a Naloxone-Dependent Manner. *Arch Phys Med Rehabil*. 2005;86:1736–40.
68. Rhodes RE, Kates A. Can the Affective Response to Exercise Predict Future Motives and Physical Activity Behavior? A Systematic Review of Published Evidence. *Ann Behav Med*. 2015;49:715–31.
69. Ekkekakis P. People have feelings! Exercise psychology in paradigmatic transition. *Curr Opin Psychol*. 2017;16:84–8.
